# Supplementary material for: Impacts of Natural Selection on Evolution of Core and Symbiotically Specialized (sym) Genes in the Polytypic Species Neorhizobium galegae
Source: MDPI journal article supplement (doi:10.3390/ijms242316696), 2023-11-24
Supplement: s1 [file s1]

## Supplementary

**Figure S1.** Regression between polymorphism (p-distance) and selection (log-normalized dN/dS index) of core genes pool of two biovars: *orientalis* and *officinalis*.

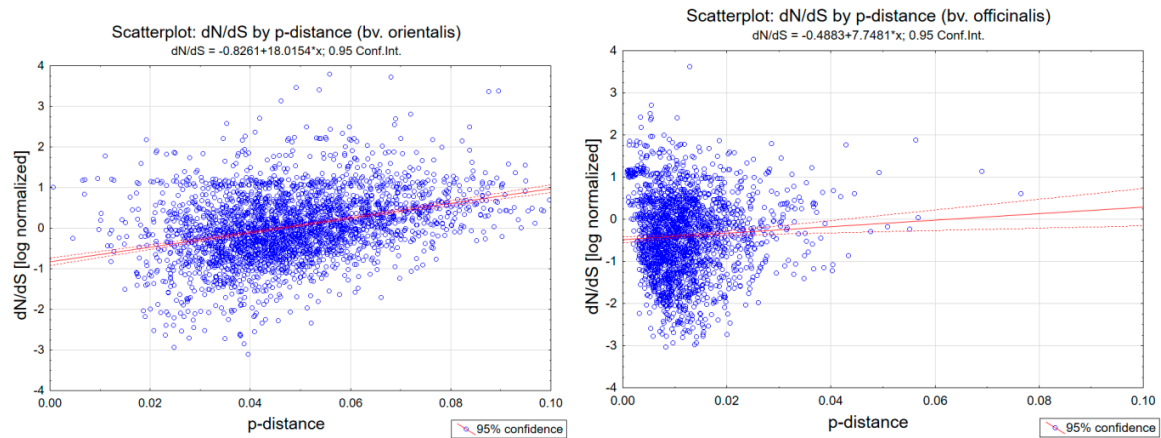

**Table S1.** Representations (%) of *Neorhizobium galegae* core genes in the clusters identified by the gene nucleotide polymorphism (p-distance) and natural selection (dN/dS) indices (based on analysis of 782 genes which are polymorphic in biovars *orientalis* and *officinalis*).

| Indices    | Phenotypes of clusters (introduced in the text) |           |           |           |
|------------|-------------------------------------------------|-----------|-----------|-----------|
|            | Ori+Off+                                        | Ori+Off–  | Ori–Off+  | Ori–Off–  |
| p-distance | 29,3±1,63                                       | 14,3±1,25 | 19,6±1,42 | 36,8±1,72 |
| dN/dS      | 18,9±1,40                                       | 24,4±1,53 | 10,8±1,11 | 45,9±1,78 |

**Table S2.** GO (Gene Ontology) enrichment (predominance of functional groups) of biovars *orientalis* and *officinalis* (I), 229 genes, *orientalis* (II), 153 genes and *officinalis* (III), 112 genes. The most enriched 10 functional groups of GO are shown, with a polymorphism (p-distance) value above the average. The last group (IV) *officinalis* and *orientalis*, 288 genes with a polymorphism (p-distance) value below the average. 782 genes were used in the functional analysis.

| GO                                                                             | COG  | All genes | Selected | Enrichment | P. val | Description                                         |
|--------------------------------------------------------------------------------|------|-----------|----------|------------|--------|-----------------------------------------------------|
| <b>(I) <i>orientalis</i>+<i>officinalis</i> (p-distance more than average)</b> |      |           |          |            |        |                                                     |
| GO:0009396                                                                     | EFH  | 6         | 6        | 3.41485    | 0.0005 | folic acid-containing compound biosynthetic process |
| GO:0006040                                                                     | FGJM | 6         | 6        | 3.41485    | 0.0003 | amino sugar metabolic process                       |

|                                                                     |          |            |            |         |        |                                                     |
|---------------------------------------------------------------------|----------|------------|------------|---------|--------|-----------------------------------------------------|
| GO:0042559                                                          | EFH      | 7          | 6          | 2.92701 | 0.0024 | pteridine-containing compound biosynthetic process  |
| GO:0006760                                                          | EFH      | 7          | 6          | 2.92701 | 0.0022 | folic acid-containing compound metabolic process    |
| GO:0046653                                                          | EFH      | 6          | 5          | 2.84571 | 0.0097 | tetrahydrofolate metabolic process                  |
| GO:0008170                                                          | JS       | 6          | 5          | 2.84571 | 0.0121 | N-methyltransferase activity                        |
| GO:0032508                                                          | L        | 5          | 4          | 2.73188 | 0.025  | DNA duplex unwinding                                |
| GO:0032392                                                          | L        | 5          | 4          | 2.73188 | 0.0274 | DNA geometric change                                |
| GO:0019200                                                          | GQ       | 5          | 4          | 2.73188 | 0.0263 | carbohydrate kinase activity                        |
| GO:0017004                                                          | OS       | 5          | 4          | 2.73188 | 0.0254 | cytochrome complex assembly                         |
| <b>(II) <i>orientalis</i> only (p-distance more than average)</b>   |          | <b>782</b> | <b>153</b> |         |        |                                                     |
| GO:1901271                                                          | IMS      | 5          | 4          | 4.08889 | 0.0058 | lipooligosaccharide biosynthetic process            |
| GO:0033293                                                          | CM       | 5          | 4          | 4.08889 | 0.0062 | monocarboxylic acid binding                         |
| GO:0009245                                                          | IMS      | 5          | 4          | 4.08889 | 0.0057 | lipid A biosynthetic process                        |
| GO:0009312                                                          | GIMS     | 7          | 5          | 3.65079 | 0.0053 | oligosaccharide biosynthetic process                |
| GO:1901269                                                          | IMS      | 6          | 4          | 3.40741 | 0.014  | lipooligosaccharide metabolic process               |
| GO:0046493                                                          | IMS      | 6          | 4          | 3.40741 | 0.0157 | lipid A metabolic process                           |
| GO:0016791                                                          | EFGIPT   | 6          | 4          | 3.40741 | 0.0153 | phosphatase activity                                |
| GO:0016311                                                          | EFGIPT   | 6          | 4          | 3.40741 | 0.0144 | dephosphorylation                                   |
| GO:0009311                                                          | GIMS     | 8          | 5          | 3.19444 | 0.0092 | oligosaccharide metabolic process                   |
| GO:0042578                                                          | EFGIKPST | 10         | 5          | 2.55556 | 0.0273 | phosphoric ester hydrolase activity                 |
| <b>(III) <i>officinalis</i> only (p-distance more than average)</b> |          | <b>782</b> | <b>112</b> |         |        |                                                     |
| GO:0016840                                                          | EF       | 5          | 4          | 5.58571 | 0.0015 | carbon-nitrogen lyase activity                      |
| GO:0043023                                                          | JMS      | 5          | 3          | 4.18929 | 0.0248 | ribosomal large subunit binding                     |
| GO:0009185                                                          | FG       | 5          | 3          | 4.18929 | 0.0251 | ribonucleoside diphosphate metabolic process        |
| GO:0009179                                                          | FG       | 5          | 3          | 4.18929 | 0.023  | purine ribonucleoside diphosphate metabolic process |

|                                                                       |       |            |            |         |        |                                                         |
|-----------------------------------------------------------------------|-------|------------|------------|---------|--------|---------------------------------------------------------|
| GO:0009135                                                            | FG    | 5          | 3          | 4.18929 | 0.0236 | purine nucleoside diphosphate metabolic process         |
| GO:0006526                                                            | EF    | 7          | 4          | 3.98980 | 0.0112 | arginine biosynthetic process                           |
| GO:0006525                                                            | EF    | 7          | 4          | 3.98980 | 0.0111 | arginine metabolic process                              |
| GO:0031163                                                            | EOS   | 6          | 3          | 3.49107 | 0.0386 | metallo-sulfur cluster assembly                         |
| GO:0019318                                                            | CGM   | 8          | 4          | 3.49107 | 0.0171 | hexose metabolic process                                |
| GO:0016226                                                            | EOS   | 6          | 3          | 3.49107 | 0.0406 | iron-sulfur cluster assembly                            |
| <b>(IV) officinalis and orientalis (p-distance less than average)</b> |       | <b>782</b> | <b>288</b> |         |        |                                                         |
| GO:0051085                                                            | O     | 5          | 5          | 2.71528 | 0.0066 | chaperone cofactor-dependent protein refolding          |
| GO:0051084                                                            | O     | 5          | 5          | 2.71528 | 0.0079 | 'de novo' posttranslational protein folding             |
| GO:0045259                                                            | C     | 5          | 5          | 2.71528 | 0.0076 | proton-transporting ATP synthase complex                |
| GO:0044087                                                            | DJKOS | 8          | 8          | 2.71528 | 0.0006 | regulation of cellular component biogenesis             |
| GO:0043254                                                            | KO    | 5          | 5          | 2.71528 | 0.0069 | regulation of protein-containing complex assembly       |
| GO:0042274                                                            | JS    | 15         | 15         | 2.71528 | 0.0001 | ribosomal small subunit biogenesis                      |
| GO:0034249                                                            | JS    | 5          | 5          | 2.71528 | 0.0071 | negative regulation of cellular amide metabolic process |
| GO:0022625                                                            | J     | 22         | 22         | 2.71528 | 0.0001 | cytosolic large ribosomal subunit                       |
| GO:0017148                                                            | JS    | 5          | 5          | 2.71528 | 0.0074 | negative regulation of translation                      |
| GO:0016469                                                            | C     | 5          | 5          | 2.71528 | 0.0092 | proton-transporting two-sector ATPase complex           |

**Table S3.** GO (Gene Ontology) enrichment (predominance of functional groups) of biovars *orientalis* (646 genes) and *officinalis* (623 genes). The most enriched 10 functional groups of GO with a dN/dS ratio less than one (stabilizing selection) are shown. 782 genes were used in the functional analysis.

| GO                | All genes  | Selected   | Enrichment | P. val | dN/dS | StDev | Description                          |
|-------------------|------------|------------|------------|--------|-------|-------|--------------------------------------|
| <i>Orientalis</i> | <b>782</b> | <b>646</b> |            |        |       |       |                                      |
| GO:0098797        | 17         | 17         | 1,21       | 0,0372 | 0,403 | 0,252 | plasma membrane protein complex      |
| GO:0097659        | 18         | 18         | 1,21       | 0,0302 | 0,291 | 0,249 | nucleic acid-templated transcription |
| GO:0046031        | 4          | 4          | 1,21       | 0,0001 | 0,438 | 0,287 | ADP metabolic process                |

|                    |            |            |      |        |       |       |                                                  |
|--------------------|------------|------------|------|--------|-------|-------|--------------------------------------------------|
| GO:0032774         | 18         | 18         | 1,21 | 0,0336 | 0,291 | 0,249 | RNA biosynthetic process                         |
| GO:0009124         | 16         | 16         | 1,21 | 0,0448 | 0,38  | 0,266 | nucleoside monophosphate biosynthetic process    |
| GO:0007154         | 19         | 19         | 1,21 | 0,0282 | 0,394 | 0,191 | cell communication                               |
| GO:0006351         | 18         | 18         | 1,21 | 0,031  | 0,291 | 0,249 | transcription, DNA-templated                     |
| GO:0006091         | 31         | 30         | 1,17 | 0,0193 | 0,437 | 0,262 | generation of precursor metabolites and energy   |
| GO:0016874         | 44         | 41         | 1,13 | 0,0387 | 0,426 | 0,222 | Ligase activity                                  |
| GO:0005515         | 102        | 95         | 1,13 | 0,0007 | 0,407 | 0,216 | protein amino acid binding, glycoprotein binding |
| <b>Officinalis</b> | <b>782</b> | <b>623</b> |      |        |       |       |                                                  |
| GO:0072330         | 18         | 18         | 1,26 | 0,0153 | 0,574 | 0,262 | monocarboxylic acid biosynthetic process         |
| GO:0071826         | 31         | 31         | 1,26 | 0,0008 | 0,366 | 0,101 | ribonucleoprotein complex subunit organization   |
| GO:0070925         | 31         | 31         | 1,26 | 0,0003 | 0,369 | 0,103 | organelle assembly                               |
| GO:0046364         | 6          | 6          | 1,26 | 0,0001 | 0,475 | 0,164 | monosaccharide biosynthetic process              |
| GO:0042886         | 14         | 14         | 1,26 | 0,0393 | 0,399 | 0,283 | amide transport                                  |
| GO:0042274         | 15         | 15         | 1,26 | 0,0313 | 0,455 | 0     | ribosomal small subunit biogenesis               |
| GO:0042273         | 14         | 14         | 1,26 | 0,0428 | 0,224 | 0     | ribosomal large subunit biogenesis               |
| GO:0042255         | 30         | 30         | 1,26 | 0,0011 | 0,34  | 0,115 | ribosome assembly                                |
| GO:0033036         | 16         | 16         | 1,26 | 0,0245 | 0,349 | 0,234 | macromolecule localization                       |
| GO:0022618         | 30         | 30         | 1,26 | 0,0009 | 0,34  | 0,115 | ribonucleoprotein complex assembly               |

**Table S4.** GO (Gene Ontology) enrichment (predominance of functional groups) of biovars *orientalis* (136 genes) and *officinalis* (159 genes). The most enriched 10 functional groups of GO with dN/dS ratio greater than one (driving selection) are shown. 782 genes participated in the functional analysis.

| GO                       | All genes  | Selected   | Enrichment | P. val | dN/dS | StDev | Description                                                            |
|--------------------------|------------|------------|------------|--------|-------|-------|------------------------------------------------------------------------|
| <b><i>Orientalis</i></b> | <b>782</b> | <b>136</b> |            |        |       |       |                                                                        |
| GO:0019584               | 3          | 3          | 5.75       | 0.0053 | 3.383 | 2.957 | galactonate catabolic process                                          |
| GO:0019583               | 3          | 3          | 5.75       | 0.0050 | 3.383 | 2.957 | galactonate metabolic process                                          |
| GO:0016855               | 6          | 5          | 4.79       | 0.0008 | 1.585 | 0.359 | racemase and epimerase activity, acting on amino acids and derivatives |
| GO:0047661               | 5          | 4          | 4.6        | 0.0039 | 1.595 | 0.401 | L-amino acid racemase activity                                         |
| GO:0036361               | 5          | 4          | 4.6        | 0.0032 | 1.595 | 0.401 | racemase activity, acting on amino acids and derivatives               |
| GO:0046176               | 4          | 3          | 4.31       | 0.0186 | 3.383 | 2.957 | aldonic acid catabolic process                                         |
| GO:0019520               | 4          | 3          | 4.31       | 0.0195 | 3.383 | 2.957 | aldonic acid metabolic process                                         |
| GO:0009103               | 4          | 3          | 4.31       | 0.0199 | 1.676 | 0.408 | lipopolysaccharide biosynthetic process                                |

|                           |            |            |      |        |       |       |                                                                                       |
|---------------------------|------------|------------|------|--------|-------|-------|---------------------------------------------------------------------------------------|
| GO:0016854                | 10         | 7          | 4.02 | 0.0001 | 1.536 | 0.376 | racemase and epimerase activity                                                       |
| GO:0009074                | 5          | 3          | 3.45 | 0.0419 | 3.6   | 3.606 | aromatic amino acid family catabolic process                                          |
| <b><i>Officinalis</i></b> | <b>782</b> | <b>159</b> |      |        |       |       |                                                                                       |
| GO:0019584                | 3          | 3          | 4.92 | 0.0085 | 2.073 | 0.486 | galactonate catabolic process                                                         |
| GO:0019583                | 3          | 3          | 4.92 | 0.0079 | 2.073 | 0.486 | galactonate metabolic process                                                         |
| GO:0046176                | 4          | 3          | 3.69 | 0.0287 | 2.073 | 0.486 | aldonic acid catabolic process                                                        |
| GO:0019520                | 4          | 3          | 3.69 | 0.0279 | 2.073 | 0.486 | aldonic acid metabolic process                                                        |
| GO:0006749                | 4          | 3          | 3.69 | 0.0258 | 2.694 | 1.432 | glutathione metabolic process                                                         |
| GO:0008168                | 19         | 9          | 2.33 | 0.0082 | 1.595 | 0.57  | molecular_function                                                                    |
| GO:0008757                | 17         | 8          | 2.31 | 0.0126 | 1.564 | 0.597 | S-adenosylmethionine-dependent methyltransferase activity                             |
| GO:0019842                | 13         | 6          | 2.27 | 0.0295 | 1.924 | 0.682 | vitamin binding                                                                       |
| GO:0006400                | 18         | 8          | 2.19 | 0.0150 | 1.505 | 0.394 | tRNA modification                                                                     |
| GO:0016616                | 16         | 7          | 2.15 | 0.0264 | 2.713 | 1.051 | oxidoreductase activity, acting on the CH-OH group of donors, NAD or NADP as acceptor |

**Table S5.** Frequencies (F) of Gene Ontology Groups (GOGs) with high dN/dS values among GOGs with high or low p-distance values

| Biovars            | p-distances in the compared GOGs |           |             |           | t <sub>st</sub> (P <sub>0</sub> )* |
|--------------------|----------------------------------|-----------|-------------|-----------|------------------------------------|
|                    | High-in-High                     |           | High-in-Low |           |                                    |
|                    | N (n)                            | F = n/N   | N (n)       | F = n/N   |                                    |
| <i>Orientalis</i>  | 31 (11)                          | 0,35±0,09 | 45 (1)      | 0,02±0,02 | 3,58 (< 0,01)                      |
| <i>Officinalis</i> | 47 (9)                           | 0,19±0,06 | 29 (4)      | 0,16±0,07 | 0,32 (> 0,10)                      |

N – numbers of GOGs with high or low p-distance values identified in different biovars; n – numbers of GOGs with high dN/dS values (N and n values are calculated from Table 3).

\*Students criterion values and probabilities of null-hypothesis are given for F value comparisons.

**Table S6.** Frequencies (F) of Gene Ontology Groups (GOGs) with high p-distance values among GOGs with high or low dN/dS values

| Biovars            | dN/dS in the compared GOGs |           |             |           | t <sub>st</sub> (P <sub>0</sub> )* |
|--------------------|----------------------------|-----------|-------------|-----------|------------------------------------|
|                    | High-in-High               |           | High-in-Low |           |                                    |
|                    | N (n)                      | F = n/N   | N (n)       | F = n/N   |                                    |
| <i>Orientalis</i>  | 12 (11)                    | 0,92±0,08 | 64 (20)     | 0,31±0,06 | 6,10 (< 0,01)                      |
| <i>Officinalis</i> | 13 (9)                     | 0,69±0,13 | 63 (38)     | 0,60±0,06 | 0,33 (> 0,10)                      |

N – numbers of GOGs with high or low dN/dS values identified in different biovars; n – numbers of GOGs with high p-distance values (N and n values are calculated from Table 3).

\*Students criterion values and probabilities of null-hypothesis are given for F value comparisons.

**Table S7.** List of symbiotic *nif*, *fix* and *nod* genes and their allocation on genomes *Rhizobia Galega* bv. *Officinalis* and *Orientalis*.

| Type of symbiotic gene | Gene name | <i>Officinalis</i> (st. NG37) |         |   |             | <i>Orientalis</i> (st. NG87) |         |   |              |
|------------------------|-----------|-------------------------------|---------|---|-------------|------------------------------|---------|---|--------------|
|                        |           | Position                      |         |   | Allocation* | Position                     |         |   | Allocation** |
| NIF                    | NIFS      | 2487118                       | 2488587 | + | chr         | 1916477                      | 1917946 | + | chr          |
|                        | NIFH      | 252902                        | 254401  | + | P2          | 796286                       | 796987  | - | P1           |
|                        | NIFD      | 254498                        | 256039  | + | P2          | 794896                       | 795792  | - | P1           |
|                        | NIFK      | 256095                        | 257525  | + | P2          | 793295                       | 794794  | - | P1           |
|                        | NIFE      | 257544                        | 258890  | + | P2          | 791656                       | 793197  | - | P1           |
|                        | NIFN      | 259622                        | 259951  | + | P2          | 790170                       | 791600  | - | P1           |
|                        | NIFA      | 265832                        | 266077  | + | P2          | 782742                       | 783326  | - | P1           |
|                        | NIFB      | 268251                        | 268487  | + | P2          | 778608                       | 780161  | - | P1           |
| FIX                    | FIXN      | 501681                        | 502412  | + | chr         | 4500819                      | 4501550 | + | chr          |
|                        | FIXP      | 503586                        | 505166  | + | chr         | 4502727                      | 4504307 | + | chr          |
|                        | FIXG      | 505163                        | 505672  | + | chr         | 4504304                      | 4504813 | + | chr          |
|                        | FIXH      | 505669                        | 507960  | + | chr         | 4504810                      | 4507101 | + | chr          |
|                        | FIXI      | 507957                        | 508103  | + | chr         | 4507098                      | 4507244 | + | chr          |
|                        | FIXS      | 508299                        | 508700  | + | chr         | 4507359                      | 4509281 | - | chr          |
|                        | FIXL      | 2909107                       | 2909727 | + | chr         | 2385220                      | 2385840 | + | chr          |
|                        | FIXK      | 2911141                       | 2911836 | - | chr         | 2387251                      | 2387943 | - | chr          |
|                        | FIXA      | 261200                        | 262273  | + | P2          | 787783                       | 788022  | + | P1           |
|                        | FIXB      | 262266                        | 263573  | + | P2          | 786511                       | 787398  | - | P1           |
|                        | FIXC      | 263586                        | 263882  | + | P2          | 785364                       | 786437  | - | P1           |
|                        | FIXX      | 264040                        | 265665  | + | P2          | 784064                       | 785371  | - | P1           |
|                        | FIXU      | 268785                        | 269984  | + | P2          | 776702                       | 776893  | - | P1           |
| NOD                    | NODT      | 274696                        | 275265  | - | chr         | 4264116                      | 4264685 | - | chr          |
|                        | NODG_1    | 985203                        | 986240  | + | chr         | 141852                       | 142889  | + | chr          |
|                        | NODG_2    | 1780375                       | 1780611 | + | chr         | 1063427                      | 1063663 | + | chr          |
|                        | NODN_1    | 3726916                       | 3727023 | + | chr         | 3327450                      | 3328232 | + | chr          |
|                        | NODW      | 1427423                       | 1427794 | + | P1          | 471840                       | 473345  | + | chr          |
|                        | NODO      | 53984                         | 55684   | + | P2          | 627468                       | 628772  | - | P1           |
|                        | NODN_2    | 59190                         | 60008   | + | P2          | 712588                       | 713406  | + | P1           |
|                        | NODD2     | 60099                         | 61160   | + | P2          | 713497                       | 714585  | + | P1           |
|                        | NODE      | 241845                        | 242123  | - | P2          | 765364                       | 765642  | - | P1           |
|                        | NODF      | 242595                        | 243158  | - | P2          | 766797                       | 767729  | - | P1           |
|                        | NODD1     | 246978                        | 247676  | + | P2          | 767978                       | 768568  | + | P1           |
|                        | NODA      | 247673                        | 248311  | + | P2          | 768565                       | 769209  | + | P1           |
|                        | NODB      | 248335                        | 249636  | + | P2          | 769233                       | 770534  | + | P1           |
|                        | NODC      | 249639                        | 250682  | + | P2          | 770537                       | 771580  | + | P1           |
|                        | NODI      | 250685                        | 251473  | + | P2          | 771748                       | 772371  | + | P1           |
|                        | NODJ      | 251631                        | 251777  | + | P2          | 772610                       | 772873  | + | P1           |
|                        | NODU      | 272838                        | 274055  | + | P2          | 1299276                      | 1299437 | + | P1           |

\* *bv. Officinalis* (st. NG37): chr is main chromosome (VYYB01000001); P1 (VYYB01000002), P2 (VYYB01000004) are plasmids

\*\* *bv. Orientalis* (st. NG87): chr is main chromosome (VZUL01000002); P1 (VYYB01000002), P1 (VZUL01000003) is plasmid.

**Table S8.** Nucleotide polymorphism (p-distance) of *sym* and core genes within biovars of two polytypic rhizobia species

| Genes                                   | <i>Neorhizobium galegae</i> |                        | <i>Rhizobium leguminosarum</i> |                     |
|-----------------------------------------|-----------------------------|------------------------|--------------------------------|---------------------|
|                                         | <i>bv. orientalis</i>       | <i>bv. officinalis</i> | <i>bv. viciae</i>              | <i>bv. trifolii</i> |
| <i>sym</i>                              | 0.028±0.008                 | 0.005±0.001            | 0.039±0.005                    | 0.135±0.012         |
| core                                    | 0.048±0.001                 | 0.010±0.001            | 0.019±0.004                    | 0.031±0.007         |
| <i>sym</i> /core                        | 0,58                        | 0,50                   | 2.05                           | 4.40                |
| <i>t<sub>st</sub></i> (P <sub>0</sub> ) | 2,49 (< 0.05)               | 3,57 (< 0.01)          | 3,33 (< 0.01)                  | 7,43 (< 0.01)       |

**Table S9.** Comparison of nucleotide sequences (p-distance) of *sym* and core genes between biovars in two polytypic rhizobia species: *Neorhizobium galegae* (Ng) and *Rhizobium leguminosarum* (Rl)

| Genes                                   | Ng            | Rl              | <i>t<sub>st</sub></i> (P <sub>0</sub> ) |
|-----------------------------------------|---------------|-----------------|-----------------------------------------|
| <i>sym</i>                              | 0.080±0.010   | 0.249±0.012     | 10,56 (< 0.001)                         |
| core                                    | 0.071±0.001   | 0.029±0.009     | 4,67 (< 0.01)                           |
| <i>sym</i> /core                        | 1.13          | 8.48            | -                                       |
| <i>t<sub>st</sub></i> (P <sub>0</sub> ) | 6,36 (< 0.01) | 14,66 (< 0.001) | -                                       |
